# Supplementary material for: Novel Benchmark Values for Redo Liver Transplantation: Does the Outcome Justify the Effort?
Source: PubMed Central journal article supplement — Ann Surg. 2022 Jul 27;276(5):860–7. doi: 10.1097/SLA.0000000000005634 (PMC9983740; doi:10.1097/sla.0000000000005634), 2022-07-27

# Supplementary Digital Content

## Table of contents

### *Supplementary Tables*

**Supplementary Table 1.** Inclusion and Exclusion Criteria for the Redo Liver Transplantation Benchmark Cohort

**Supplementary Table 2.** Characteristics of Patients According to Pre-operative Risk Stratification

**Supplementary Table 3.** Outcomes After Redo Liver Transplantation in Higher-Risk Groups compared With the Benchmark Group

### *Supplementary Figures*

**Supplementary Figure 1. Selection of the redo liver transplantation benchmark cohort.**

Initially, cases with too short follow-up or incomplete complication monitoring, second or even third redo-LT, redo-LT with the use of partial liver grafts, and cases in which redo-LT occurred outside the study period were excluded. Based on available literature, low-risk cases were defined and 373 redo-LT benchmark cases were identified. Redo-LT, redo liver transplantation; DBD, donation after brain death; MELD, laboratory model for end-stage liver disease; PNF, primary non-function; HAT, hepatic artery thrombosis.

**Supplementary Figure 2. Odds ratio for the development of complications.** Benchmark cases with a pre-defined low-risk profile had significantly lower odds ratio for the development of any postoperative complications at 1-year postoperatively compared to non-benchmark cases, as shown by generalized linear models analysis.

**Supplementary Figure 3. Correlation between transplant center volume and number of performed redo liver transplantations.** There is a significant correlation between the transplant center volume and redo liver transplantation caseload.

**Supplementary Table 1** *Inclusion and Exclusion Criteria for the Redo Liver Transplantation Benchmark Cohort*

| <b>Low-risk criteria<br/>(Benchmark)</b>                                                                                                                                                        | <b>High-risk criteria<br/>(Non-benchmark)</b>                                                                                                                                                                                           |
|-------------------------------------------------------------------------------------------------------------------------------------------------------------------------------------------------|-----------------------------------------------------------------------------------------------------------------------------------------------------------------------------------------------------------------------------------------|
| <p>Recipient age <math>\geq 18</math> years</p> <p>Recipient with MELD score <math>\leq 25</math></p> <p>DBD liver graft</p> <p>Absence of any high-risk criteria listed in the next column</p> | <p>Recipient on mechanical ventilation</p> <p>Recipient listed as high urgency</p> <p>Redo-LT within 30 days after primary LT</p> <p>Redo-LT for PNF or early HAT</p> <p>DCD liver graft</p> <p>Portal vein thrombosis in recipient</p> |

Lab MELD, laboratory Model of end-stage liver disease score; DBD, donation after brain death; Redo-LT; Redo Liver Transplantation; LT, liver transplantation; PNF, primary non-function (defined as graft failure resulting in death or third transplantation within 7 days of redo-LT excluding other causes of graft failure such as vascular thrombosis, rejection, or recurrent disease); HAT, hepatic artery thrombosis (early occurs within the first 30 days after primary LT); DCD, donation after circulatory death.

**Supplementary Table 2** *Characteristics of Patients According to Pre-operative Risk Stratification*

|                                            | <b>Benchmark cases<br/>n = 373</b> | <b>Non-benchmark cases<br/>n = 729</b> |
|--------------------------------------------|------------------------------------|----------------------------------------|
| <b>Recipient parameters</b>                |                                    |                                        |
| Age, years                                 | 50 (39-59)                         | 53 (40-60)                             |
| Male gender                                | 222 (60)                           | 429 (59)                               |
| Weight, kg                                 | 68 (59-77)                         | 74 (62-85)                             |
| Height, m                                  | 1.70 (1.63-1.78)                   | 1.72 (1.64-1.78)                       |
| BMI, kg/m <sup>2</sup>                     | 23 (21-26)                         | 25 (22-29)                             |
| Indication for primary LT:                 |                                    |                                        |
| - PSC                                      | 100 (27)                           | 96 (13)                                |
| - PBC                                      | 18 (5)                             | 16 (2)                                 |
| - ASH-related cirrhosis                    | 53 (14)                            | 173 (24)                               |
| - NASH-related cirrhosis                   | 10 (3)                             | 59 (8)                                 |
| - CCC                                      | 1 (0.3)                            | 8 (1)                                  |
| - HCC                                      | 61 (16)                            | 176 (24)                               |
| - HCV                                      | 70 (19)                            | 152 (21)                               |
| - HBV                                      | 21 (6)                             | 58 (8)                                 |
| - Acute liver failure                      | 26 (7)                             | 63 (9)                                 |
| - Cryptogenic cirrhosis                    | 12 (3)                             | 23 (3)                                 |
| - Autoimmune hepatitis                     | 26 (7)                             | 61 (8)                                 |
| - Other                                    | 77 (21)                            | 146 (20)                               |
| Primary LT graft:                          |                                    |                                        |
| - DBD                                      | 250 (74)                           | 490 (71)                               |
| - DCD                                      | 54 (16)                            | 125 (18)                               |
| - Living donor                             | 27 (8)                             | 54 (8)                                 |
| - Other                                    | 7 (2)                              | 21 (3)                                 |
| - Unknown                                  | 35 (3)                             | 39 (4)                                 |
| Time between primary LT and redo-LT, days  | 1874 (376-3968)                    | 28 (5-1285)                            |
| Time on the waiting list for redo-LT, days | 112 (35-249)                       | 5 (2-45)                               |
| Indication for redo-LT:                    |                                    |                                        |
| - PNF                                      | 0 (0)                              | 143 (20)                               |
| - Early HAT                                | 0 (0)                              | 186 (26)                               |
| - Late HAT                                 | 72 (19)                            | 62 (9)                                 |
| - PVT                                      | 0 (0)                              | 51 (7)                                 |
| - Other vascular complication              | 34 (9)                             | 56 (8)                                 |
| - Rejection                                | 68 (18)                            | 106 (15)                               |
| - Biliary complication                     | 156 (42)                           | 19 (3)                                 |
| - Recurrence                               | 121 (32)                           | 99 (14)                                |
| - Other                                    | 55 (15)                            | 142 (20)                               |

---

**Preoperative parameters**

|                                 |               |               |
|---------------------------------|---------------|---------------|
| labMELD, score                  | 17 (11-22)    | 30 (22-36)    |
| Listed as high-urgency priority | 0 (0)         | 400 (55)      |
| On mechanical ventilation       | 0 (0)         | 246 (34)      |
| On dialysis                     | 7 (2)         | 223 (31)      |
| Donor age, years                | 49 (37-61)    | 48 (31-60)    |
| Redo-LT graft:                  |               |               |
| - DBD                           | 373 (100)     | 655 (91)      |
| - DCD                           | 0 (0)         | 64 (9)        |
| - Other                         | 0 (0)         | 1 (0.1)       |
| Cold ischemia time, minutes     | 451 (363-548) | 420 (342-508) |

---

BMI, body mass index; LT, liver transplantation; PSC, primary sclerosing cholangitis; PBC, primary biliary cholangitis; ASH, alcoholic steatohepatitis; NASH, non-alcoholic steatohepatitis; CCC, cholangiocarcinoma; HCC, hepatocellular carcinoma; HCV, hepatitis C virus; HBV, hepatitis B virus; DBD, donation after brain death; DCD, donation after circulatory death; redo-LT, redo liver transplantation; PNF, primary non function; HAT, hepatic artery thrombosis; PVT, portal vein thrombosis; labMELD score, laboratory model of end stage liver disease score.

Data shown as median and IQR or number and proportion (%).

---

**Supplementary Table 3** Outcomes After Redo Liver Transplantation in Higher-Risk Groups compared With the Benchmark Group

|                                                                                                     | <b>Recipient<br/>with PVT<br/>n=51</b> | <b>Redo-LT for<br/>early HAT<br/>n=186</b> | <b>Benchmark<br/>Cohort<br/>n=373</b> |
|-----------------------------------------------------------------------------------------------------|----------------------------------------|--------------------------------------------|---------------------------------------|
| <b>Postoperative course</b>                                                                         |                                        |                                            |                                       |
| Intensive care unit stay, days                                                                      | 8 (3-16)                               | 7 (4-16)                                   | 4 (2-8)                               |
| Hospital stay, days                                                                                 | 23 (17-35)                             | 22 (13-38)                                 | 18 (13-28)                            |
| Newly need of dialysis                                                                              | 12 (24)                                | 27 (15)                                    | 53 (14)                               |
| <b>Morbidity and Mortality at 1 year</b>                                                            |                                        |                                            |                                       |
| CCI®                                                                                                | 65 (44-99)                             | 57(34-86)                                  | 45 (21-74)                            |
| ≥Grade 2 complication                                                                               | 50 (98)                                | 172 (92)                                   | 323 (87)                              |
| ≥Grade 3a complication                                                                              | 43 (84)                                | 129 (69)                                   | 229 (61)                              |
| Mortality                                                                                           | 12 (24)                                | 32 (17)                                    | 37 (10)                               |
| <b>Key complications at 1 year</b>                                                                  |                                        |                                            |                                       |
| Primary non-function                                                                                | 3 (5.9)                                | 3 (1.6)                                    | 9 (2.4)                               |
| Intra-abdominal bleeding                                                                            | 9 (18)                                 | 25 (14)                                    | 52 (14)                               |
| Arterial complication                                                                               | 4 (8)                                  | 14 (8)                                     | 32 (9)                                |
| Hepatic artery thrombosis                                                                           | 1 (2.0)                                | 9 (4.8)                                    | 12 (3.2)                              |
| Biliary complication                                                                                | 10 (20)                                | 25 (13)                                    | 61 (16)                               |
| Anastomotic stricture                                                                               | 4 (7.8)                                | 17 (9.1)                                   | 37 (9.9)                              |
| Non anastomotic stricture                                                                           | 3 (5.9)                                | 2 (1.1)                                    | 12 (3.2)                              |
| Biliary leakage                                                                                     | 4 (7.8)                                | 14 (7.5)                                   | 23 (6.2)                              |
| Graft loss                                                                                          | 13 (26)                                | 37 (20)                                    | 47 (13)                               |
| Redo redo liver transplantation                                                                     | 2 (3.9)                                | 10 (5.4)                                   | 21 (5.6)                              |
| PVT, portal vein thrombosis; HAT, hepatic artery thrombosis; CCI, comprehensive complication index. |                                        |                                            |                                       |
| Data shown as median and IQR or number and proportion (%).                                          |                                        |                                            |                                       |

**Supplementary Figure 1. Selection of the redo liver transplantation benchmark cohort.** Initially, cases with too short follow-up or incomplete data collection, second or even third redo-LT, redo-LT with the use of partial liver grafts, and cases in which redo-LT occurred outside the study period were excluded. Based on available literature, low-risk cases were defined and 373 redo-LT benchmark cases were identified. Redo-LT, redo liver transplantation; MELD, model for end-stage liver disease; DBD, donation after brain death; PNF, primary non-function; HAT, hepatic artery thrombosis.

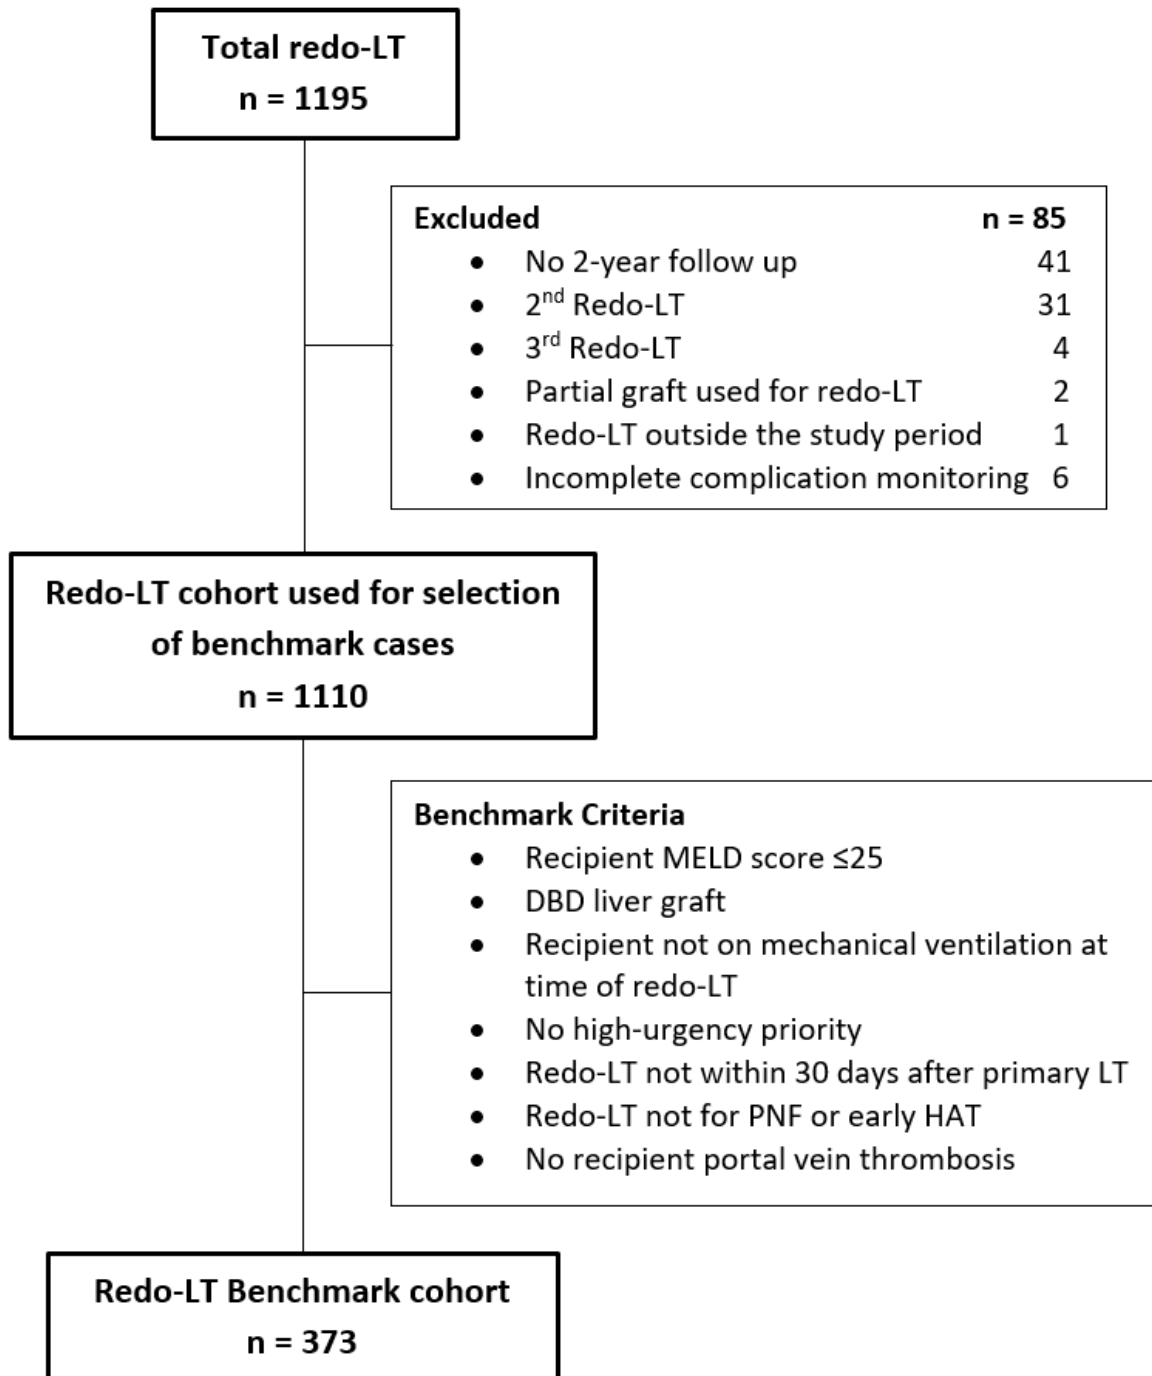

**Supplementary Figure 2. Odds ratio for the development of complications.** Benchmark cases with a pre-defined low-risk profile had significantly lower odds ratio for the development of any postoperative complications at 1-year postoperatively compared to non-benchmark cases, as shown by generalized linear models analysis.

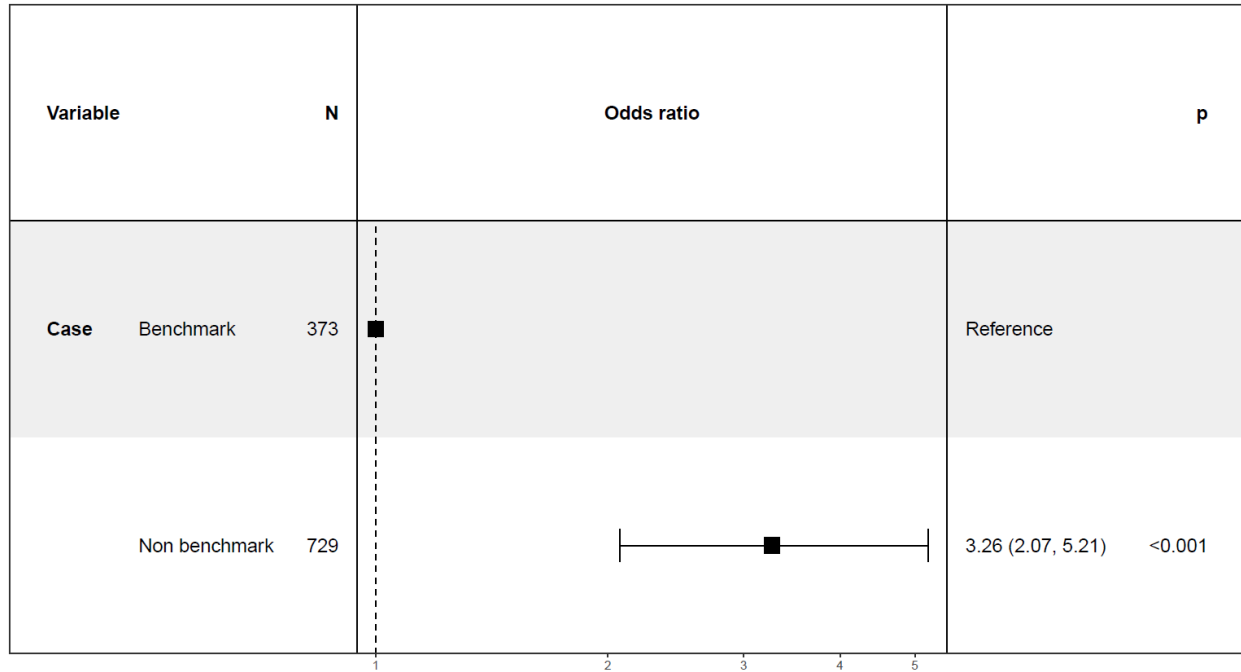

**Supplementary Figure 3. Correlation between transplant center volume and number of performed redo liver transplantations.** There is a significant correlation between the transplant center volume and redo liver transplantation caseload.

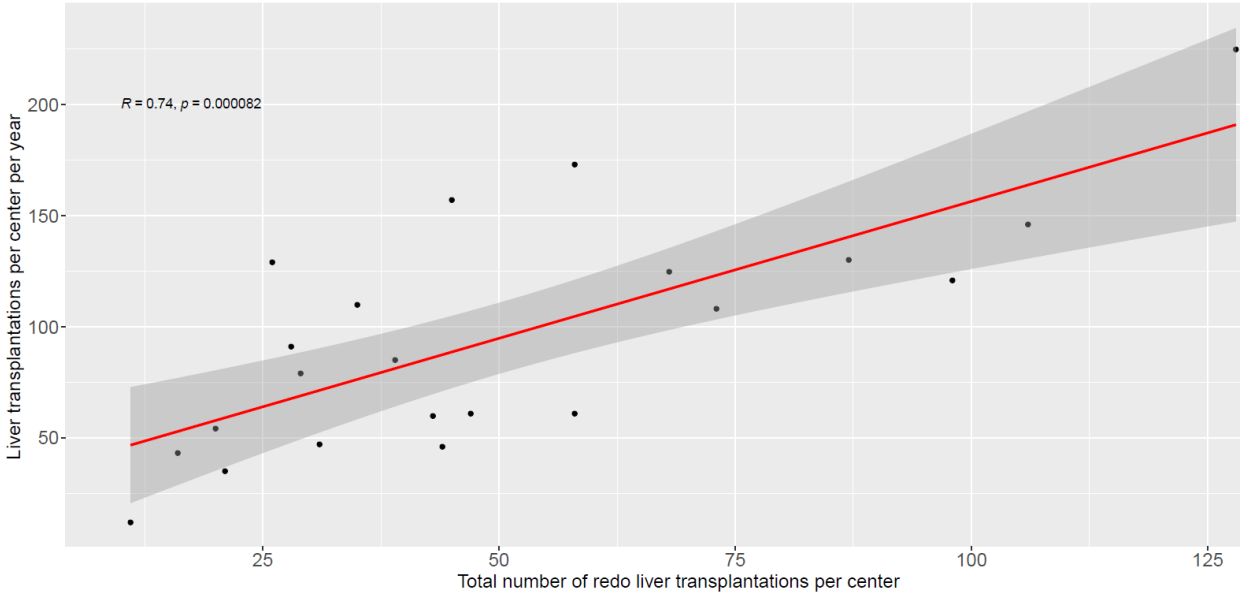

Supplement: sla-276-860-s001.pdf [file sla-276-860-s001.pdf]
